# Supplementary material
Source: HighWire-hosted journal article supplement (http://hw-f5-jim.highwire.org/highwire/filestream/141390/field_highwire_adjunct_files/1/AFMR_National_Council_70_5.pdf)
Supplement: AFMR_National_Council_70_5.pdf [file AFMR_National_Council_70_5.pdf]

## 2022-2023 AFMR National Council

View Bios online at [www.afmr.org/leadership](http://www.afmr.org/leadership).

### National Council

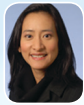

Attaya Suvannasankha, MD  
*President*

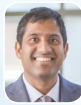

Vijay Shivaswamy, MBBS, MS  
*President-elect*

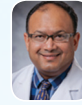

Samrat U. Das, MD  
*Immediate Past-President*

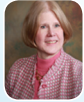

Janice P. Dutcher, MD  
*Past-President*

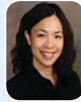

Viranuj Sueblinpong, MD  
*Secretary-Treasurer*

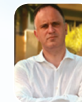

Theo Trandafirescu, MD FCCP FACP  
*Vice President for Meetings  
& Programs*

#### Committee Chairs

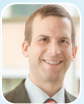

John Dickinson, MD, PhD  
*Publications Committee Chair*

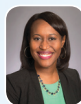

Zanthia Wiley, MD  
*Membership Committee Chair*

#### Councilors-at-Large

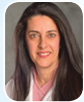

Shireen Atabaki, MD, MPH

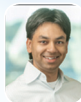

Sidharth Mahapatra, MD, PhD

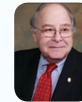

Peter Wiernik, MD

#### Ex-Officio

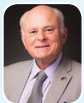

Richard W. McCallum, MD  
*Editor-in-Chief, Journal of  
Investigative Medicine*

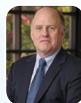

Michael J. McPhaul, MD  
*Editor-in-Chief, Journal of  
Investigative Medicine High  
Impact Case reports*

### Regional Leadership

The below executive positions in regional leadership hold seats on the National Council.

#### Eastern Section Council

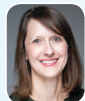

Andrea L Hahn, MD  
*Chair*

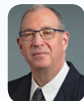

Joshua DeLeon, MD  
*Chair-Elect*

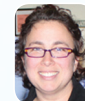

Lora J. Kasselmann, PhD, MPH  
*Secretary-Treasurer*

#### Midwest Section Council

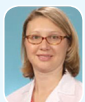

Jennifer Alexander-Brett,  
MD, PhD  
*Chair*

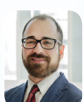

Anupam Kotwal, MBBS  
*Chair-Elect*

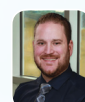

Jeffrey D Salomon, MD  
*Secretary-Treasurer*

#### Southern Section Council

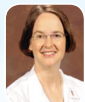

Stephanie L. Baer, MD  
*Chair*

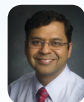

Gaurav Agarwal, MD  
*Chair-Elect*

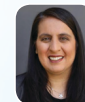

Sheetal KM Kandiah  
*Secretary-Treasurer*

#### Western Section Council

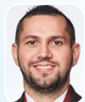

Ricardo Correa, MD  
*Chair*  
*Social Media Committee Chair*

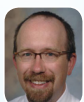

David A. Stevenson, MD,  
FACMG  
*Chair-Elect*

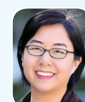

Mimi Kim, MD, MSc  
*Secretary-Treasurer*

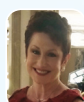

Aurelie Alger, JD  
*Supervising Director*
